# Supplementary material for: Timing of Intubation and Its Implications on Outcomes in Critically Ill Patients With Coronavirus Disease 2019 Infection
Source: PubMed Central journal article supplement — Crit Care Explor. 2020 Oct 23;2(10):e0262. doi: 10.1097/CCE.0000000000000262 (PMC7587415; doi:10.1097/cce.0000000000000262), 2020-10-23
Supplement: cc9-2-e0262-s001.pdf [file cc9-2-e0262-s001.pdf]

**Table 2. Multivariate Logistic Regression showing factors associated with early intubation among patients with COVID-19 admitted to the ICU**

| <b>Characteristics</b> | <b>Odds ratio (95% CI)</b> | <b>p-value</b> |
|------------------------|----------------------------|----------------|
| Age                    | 1.04 (0.99-1.09)           | 0.113          |
| Male                   | <i>Referrant</i>           |                |
| Female                 | 0.88 (0.35-2.24)           | 0.796          |
| Others                 | <i>Referrant</i>           |                |
| African American       | 1.24 (0.44-3.44)           | 0.686          |
| Heart Failure          | 0.47 (0.16-1.39)           | 0.171          |
| Cirrhosis              | 0.14 (0.01-1.37)           | 0.092          |
| HTN                    | 0.39 (0.07-2.08)           | 0.269          |
| SOFA on admission      | 1.40 (1.17-1.69)           | <0.0001        |
